# Supplementary material for: Disease Activity in Patients With Takayasu's Arteritis: Evaluation of 18f-fdg Pet/ct and Angiotomography Performances
Source: Research Square preprint supplement (doi:10.21203/rs.3.rs-7715443/v1), 2025-10-23
Supplement: Supplementary file 1 [file ac9704336712801edce39f59.docx]

**Suplemental:Description of clinical, laboratory, and imaging exam variables of the study population.**

| **Patient/Sex/Age** | **Visual Scale *** | **SUVmax$** | **Uptake intensity $$** | **Uptake topography** | **Clinical Activity #** | **ESR (mm/ hour)** | | **CRP (mg/liter)** | **DA&** | | **Thickening &&** |
| --- | --- | --- | --- | --- | --- | --- | --- | --- | --- | --- | --- |
| 1/F/50 | 3 | 6.01 | 1.96 | AoAsc, AoDesAoAB, | No | 9 | 5 | | No | Yes | |
| 2/M/51 | 2 | 4.86 | 1.54 | CarR, AoDesc, AoAb | No | 6 | 17 | | Yes | Yes | |
| 3/F/45 | 2 | 5.18 | 1.74 | AoAsc | No | 38 | 10.6 | | No | Yes | |
| 4/F/46 | 2 | 5.34 | 1.93 | AoAb | Yes | 12 | 13 | | Yes | Yes | |
| 5/F/24 | 3 | 6.94 | 3.03 | ArcAo, AoDesc | No | 12 | 2 | | Yes | Yes | |
| 6/F/26 | 3 | 8.3 | 2.46 | AoAsc, ArAo, AoDes, AoAb, | No | 2 | 6.5 | | No | Yes | |
| 7/F/31 | 3 | 7.74 | 1.97 | AoAsc ArcAo, Innominada, AoAb | No | 2 | 5.8 | | Yes | Yes | |
| 8/F/36 | 2 | 6.18 | 2.05 | AoAb, | Yes | 40 | 12.2 | | No | Yes | |
| 9/F/44 | 2 | 4.95 | 1.65 | AoAb | No | 10 | 4 | | No | Yes | |
| 10/F/30 | 1 | 6.32 | 1.31 | - | No | 23 | 23.8 | | Yes | Yes | |
| 11/F/38 | 1 | 5.2 | 1.73 | - | No | 20 | 6 | | No | No | |
| 12/F/42 | 2 | 6.19 | 2.22 | AoAsc, Arc Ao, AoDesc, AoAb | No | 12 | 9 | | Yes | Yes | |
| 13/F/39 | 2 | 4.79 | 1.97 | AoAsc, AoAb | No | 10 | 5 | | No | Yes | |
| 14/F/46 | 3 | 6.22 | 1.89 | AoAsc, ArcAO, AoDesc, AoAb | No | 26 | 12 | | No | Yes | |
| 15/F/45 | 3 | 6.51 | 2.03 | AoAsc, ArAo, AoDes, AoAB, | Yes | 20 | 5 | | No | Yes | |
| 16/F/31 | 2 | 4.65 | 1.60 | AoAsc, ArAo, AoDes, AoAb | Yes | 52 | 86 | | No | Yes | |
| 17/F/30 | 2 | 5.76 | 2.06 | AoAsc, AoDes, AoAb | No | 30 | 31.3 | | No | Yes | |
| 18/F/30 | 2 | 5.28 | 1.74 | AoAsc, AoDes, AoAb | No | 56 | 29.7 | | No | Yes | |
| 19/F/43 | 2 | 4.88 | 1.56 | AoAsc, ArcAo, AoDes, AoAb | Yes | 3 | 6 | | No | Yes | |

Note: * Visual uptake intensity scale: semi-quantitative measure of PET/CT activity; grade 0: no uptake; grade 1: vascular uptake smaller than the liver; grade 2: vascular uptake similar to the liver; grade 3: vascular uptake greater than the liver; $ SUVmax: maximum standardized uptake value; $$ Uptake intensity: ratio of arterial SUVmax to mean liver SUV; AoAsc: ascending aorta; ArcAo: aortic arch;; CarR: right carotid; CarL: left carotid; SubL: left subclavian; SubR: right subclavian; AoDesc: descending aorta; AoAb: abdominal aorta; ESR = erythrocyte sedimentation rate; CRP: C-reactive protein; # Clinical activity: appearance or exacerbation of objective systemic manifestations and/or ischemia; & DA: vascular alteration type image in double halo seen on angiotomography exam; && Thickening-type vascular alteration greater than 2 mm in the aortic wall and greater than 1 mm in its branches identified in the angiotomography exam
